# Supplementary material
Source: PubMed Central journal article supplement (PMC10330105)

**Supplementary Figure 1.** Clonality assessment of known oncogenic mutations in the female GCT cohort.

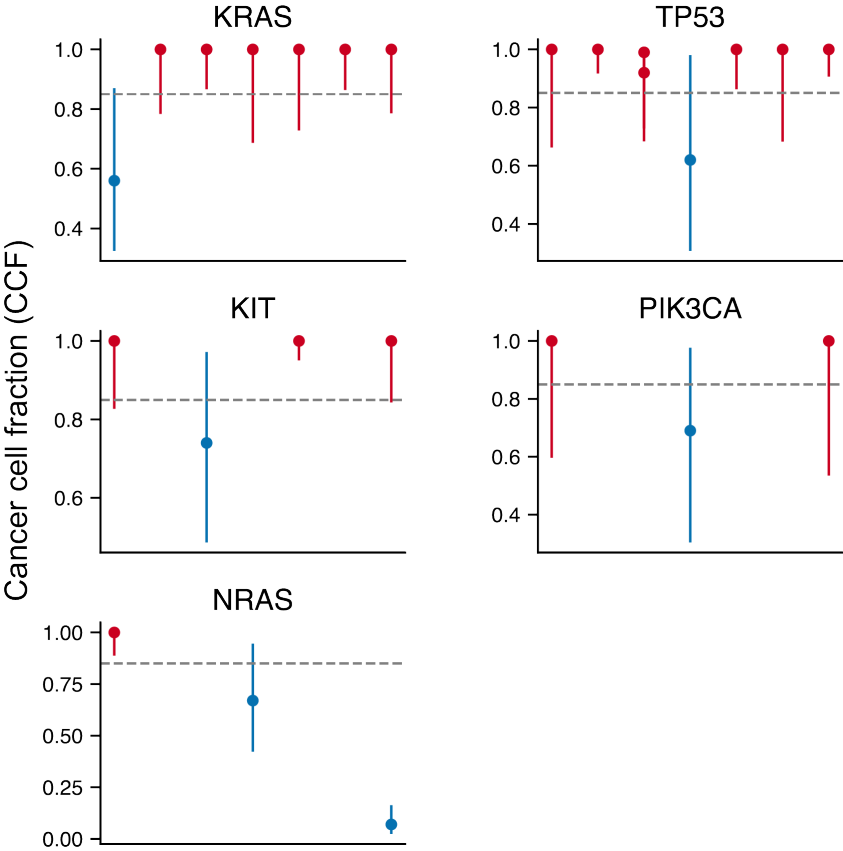

Supplement: NIHMS1881288-supplement-3.pdf [file NIHMS1881288-supplement-3.pdf]
